# Supplementary material
Source: publisher figshare collection journal article supplement (https://acs.figshare.com/ndownloader/files/13564415)
Supplement: Supplementary file 1 [file 13564415]

Supporting Information for

Preparation of Dimpled Polystyrene-Silica Colloidal  
Nanocomposite Particles

Hua Zou,\* Dandan Miao, Hao Sun, Xia Wang

School of Materials Science and Engineering, University of Shanghai for Science and  
Technology, 516 Jungong Road, Shanghai 200093, China

\* Corresponding author. E-mail: hua.zou@usst.edu.cn. Phone: +86 21 55270632.

Fax: +86 21 55270632.

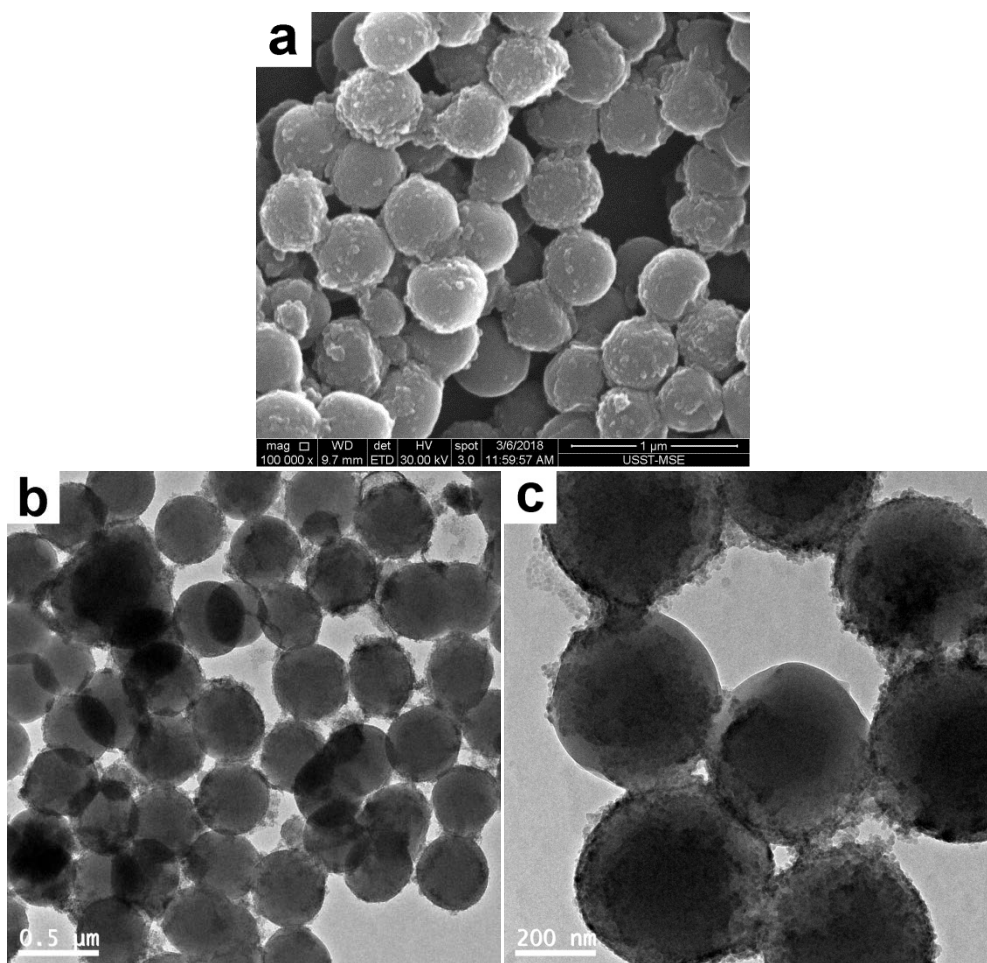

**Figure S1.** SEM (a) and TEM (b, c) images of PS-SiO<sub>2</sub> particles after stirring at 400 rpm in the presence of decane for 24 h at the boiling point in methanol/water media with a weight ratio of 7/3 (run 4).

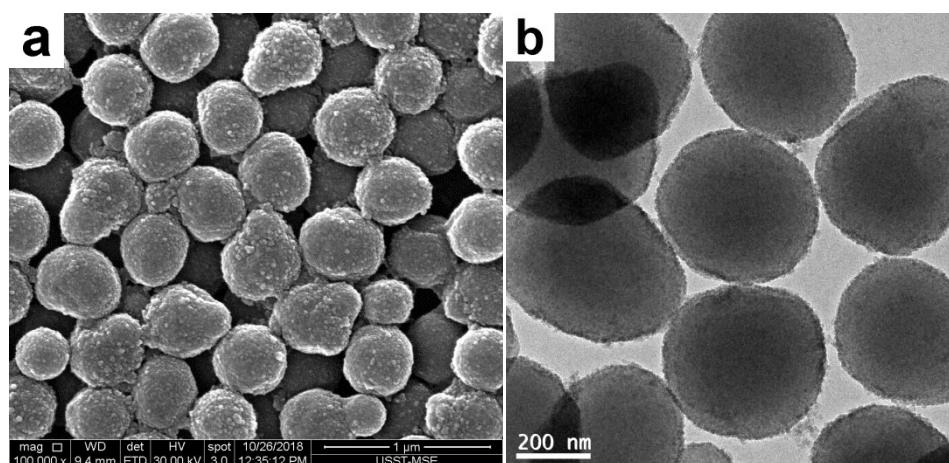

**Figure S2.** SEM (a) and TEM (b) images of PS-SiO<sub>2</sub> particles after stirring at 400 rpm in the presence of decane for 24 h in a methanol/water medium (9/1, w/w) at 55

°C (run 7).

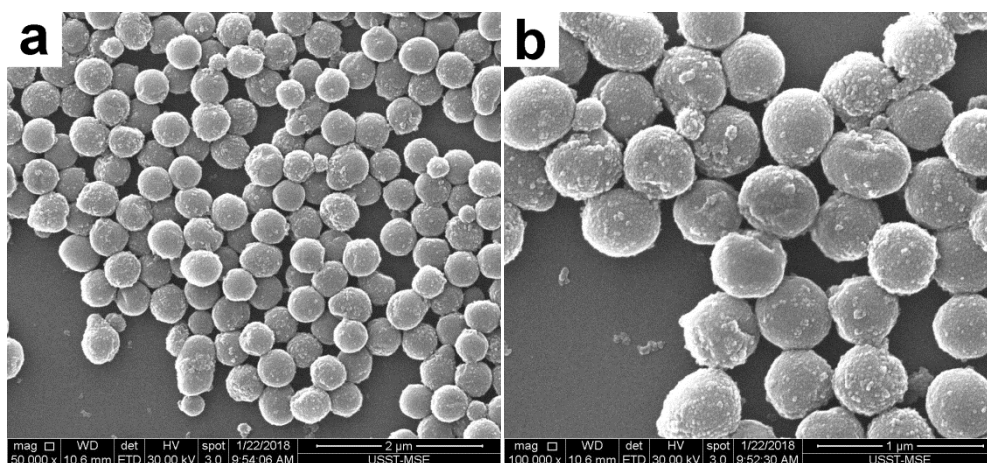

**Figure S3.** SEM images of PS-SiO<sub>2</sub> particles after stirring in the presence of decane for 24 h at boiling point in methanol/water media (8/2, w/w) at a stirring rate of 200 rpm (run 10).
